# Supplementary material for: Completely stereoselective synthesis of a chiral tetra(tertiary phosphine). Crystal and molecular structure of [OC-6-22-(R*,R*)]-(±)-dichloro{1,2-bis[(2-dimethylphosphinophenyl)methylphosphino]benzene-P,P ′,P ″,P ‴}cobalt(III) hexafluorophosphate †
Source: Royal Society of Chemistry journal article supplement (doi:10.1039/b002662j), 2000-01-01
Supplement: b002662j.doc [file b002662j.doc]

**Supplementary Material**

**Completely Stereoselective Synthesis of a Chiral Tetra(Tertiary Phosphine).**  **Crystal and Molecular Structure of [OC-6-22-(R*,R*)]-(±)-Dichloro{1,2-bis[(2-dimethylphosphinophenyl)methylphosphino]benzene-P,P',P'',P'''}cobalt(III) Hexafluorophosphate**

**Swarup Chatterjee,a Roy Doyle,a David C. R. Hockless,b Geoffrey Salem*a and Anthony C. Willisb**

aChemistry Department, The Faculties, Australian National University,

# Canberra, A. C. T. 0200, Australia

bResearch School of Chemistry, Australian National University, Canberra,

A. C. T. 0200, Australia

**Reaction of (±)-(2-chlorophenyl)(2-dimethylphosphinophenyl)methylphosphine with sodium (2-dimethylphosphinophenyl)methylphosphide is completely stereoselective giving (R*,R*)-1,2-bis[(2-dimethylphosphinophenyl)methylphosphino]benzene, (R*,R*)-1; as confirmed by a crystal structure determination of *cis* –-[CoCl2{(R*,R*)-1}]PF6.**

#### Experimental and Spectroscopic data

*(±)-(2-Dimethylphosphinophenyl)methylphosphine* - Liquid ammonia (200 ml) was condensed onto 1,2-phenylenebis(methylphosphine) (14.16 g, 0.083 mol) and an excess amount of potassium metal pieces (4.01 g, 0.102 mol) was added to the solution. The reaction mixture was stirred for 4 hours. Methyl iodide (14.54 g, 0.102 mol) in THF (25 ml) was added dropwise and the clear solution allowed to warm to room temperature overnight, to allow the ammonia to evaporate. Water (100 ml) was added to the residue, which was extracted with diethyl ether (3 x 100 ml). The diethyl ether extracts were dried (MgSO4), filtered and the solvent distilled off under argon, leaving a yellow oil. Vacuum distillation of the oil gave the product as a colourless oil. B.p 67-68 C (0.005 mmHg). Yield 14.11 g, *ca* 74% given that the product was shown to be a *ca* 4:1 mixture of (±)-(2-dimethylphosphinophenyl)methylphosphine and **3** by GC/MS. 1H n.m.r. data (300 MHz, C6D6 at 20 oC): 1.08 (d, 3 H, 2JPH 4.0 Hz, PMe*Me*), 1.14 (d, 3 H, 2JPH 3.4 Hz, P*Me*Me), 1.27 (d of d of d, 3 H, 3JHH 7.4 Hz, 2JPH 3.6 Hz, 5JP'H 0.6 Hz, PH*Me*), 4.45 (d of d of q, 1 H, 1JPH 209 Hz, 4JP'H 11.0 Hz, 3JHH 7.4 Hz, P*H*Me), 6.98 - 7.36 (m, 4 H, aromatics); 31P{1H} n.m.r. data (121.5 MHz, C6D6 at 20 oC): -72.5 (d, 1 P, 3JPP 123 Hz, PHMe), -54.4 (d, 1 P, 3JPP 123 Hz, PMe2) ; and m/e 184 (M)+, 169 (M - Me)+, 123 (M - PMe2)+.

*(±)-1-[(2-Chlorophenyl)methylphosphino]-2-(dimethylphosphino)benzene, (±)-****2***- Sodium foil (0.92 g, 0.04 mol) was added piecewise to a solution of ()-(2-methylphosphinophenyl)dimethyl-phosphine (7.38 g, 0.04 mol) in THF (100 ml) and the solution was stirred overnight. The resulting phosphide solution was added dropwise to a solution of 1,2-dichlorobenzene (5.89 g, 0.04 mol) in THF (40 ml). The reaction mixture was stirred for 4 days. Water (20 ml) was added, and the solvent removed. Further water (100 ml) was added, and the solution extracted with dichloromethane (3 x 90 ml). The organic extracts were dried (MgSO4), filtered and the solvent removed to give a yellow oil. The residue was distilled under reduced pressure. Fraction 1 [b.p 78 C (0.01 mmHg)]: 1,2-phenylenebis(dimethylphosphine) (**3**). Yield 3.14 g. Fraction 2 [b.p 135 C (0.01 mmHg)]: (±)-1-[(2-chlorophenyl)methylphosphino]-2-(dimethylphosphino)- benzene, (±)-**2**. Yield 4.75 g (65% based on the amount of **3** recovered). 1H n.m.r. data (300 MHz, C6D6 at 20 oC):  1.15 (d, 3 H, 2JPH 4.1 Hz, PMe), 1.22 (d, 3 H, 2JPH 3.4 Hz, PMe), 1.46 (d, 3 H, 2JPH 5.3 Hz, PMe), 6.78 - 7.34 (m, 8 H, aromatics); 31P{1H} n.m.r. data (121.5 MHz, C6D6 at 20 oC):  -53.2 (d, 1 P, 3JPP 154 Hz, PMe2), -36.4 (d, 1 P, 3JPP 154 Hz, PMe); and m/e 294 (M)+, 279 (M - Me)+, 259 (M - Cl)+, 183 (M - C6H4Cl)+.

*1,2-Phenylenebis(dimethylphosphine),* ***3*** - 1H n.m.r. data (300 MHz, C6D6 at 20 oC): 1.22 (t, 12 H, |2JPH + 5JP'H| 4.2 Hz, 2 PMe2), 7.17 - 7.30 (m, 4 H, aromatics); 31P{1H} n.m.r. data (121.5 MHz, C6D6 at 20 oC):  -54.8 (s, 2 P); and m/e 198 (M)+, 183 (M - Me)+.

*Cis-(±)-[CoCl2{(R*,R*)-****1****}]PF6* - Excess sodium foil (0.302 g, 13.13 mmol) was added to a solution of ()-(2-dimethylphosphinophenyl)methylphosphine (2.29 g, 12.42 mmol) in THF (50 ml). The solution was stirred overnight and then added, via a dropping funnel containing a glass wool plug, to a solution of (±)-(2-chlorophenyl)(2-dimethylphosphinophenyl)methylphosphine, (±)-**2** (3.48 g, 11.81 mmol) in THF (50 ml) at –78 C. The dark red solution was allowed to warm to room temperature and stirred for 7 days, by which time the reaction mixture was a very pale yellow. The solvent was distilled off under argon, and water (100 ml) was added. The residue was extracted with dichloromethane (3 x 100 ml), the organic extracts were combined, dried (MgSO4), filtered, and the solvent distilled off under argon to leave a clear oil and white solid. This was dissolved in hot methanol (150 ml), a solution of hexaaquacobalt(II) chloride [3.09 g, 12.99 mmol (10 % excess)] was added dropwise and the reaction mixture stirred for 1 hour. Hydrochloric acid (10M, 6 ml) was added and air was drawn through the solution for 4.5 hours. The solvent was removed under reduced pressure. Water (120 ml) was added to the residue, and the mixture was refluxed for 4 h. The solution was allowed to cool to room temperature overnight. The silver-grey precipitate, *trans*-[CoCl2(**3**)2]Cl, was filtered off and washed with cold water. The filtrate was left at 5 C for 2 days, resulting in the further precipitation of *trans*-[CoCl2(**3**)2]Cl, which was filtered off. The isolated complexes were combined and recrystallised from methanol (200 ml), filtered, washed with diethyl ether (20 ml) and dried *in vacuo*. Yield 1.65 g, 49%.

The red filtrate was left standing for 2 weeks, resulting in precipitation of red rosettes of *cis*--(±)-[CoCl2{(R*,R*)-**1**}]Cl, which were filtered off and washed with diethyl ether. Yield 0.67 g, 16%. The chloride salt *cis*--(±)-[CoCl2{(R*,R*)-**1**}]Cl(0.20 g, 0.33 mmol) was dissolved in methanol (20 ml) and ammonium hexafluorophosphate (0.11 g, 0.66 mmol) in water (1 ml) was added dropwise. Water (20 ml) was added and the solution was stirred for 30 minutes. The product was filtered off and washed with water (5 ml), diethyl ether/methanol (4:1) (5 ml) and diethyl ether (10 ml), and dried *in vacuo*. Yield 0.21 g (88%). M.p. 310 – 312 C; 1H n.m.r. data [300 MHz, (CD3)2CO at 20 oC]:  2.09 (m, 6 H, 2 PMe), 2.31 (t, 6 H, |2JPH + 4JP'H| 10.9 Hz, 2 PMe*Me*), 2.43 (t, 6 H, |2JPH + 4JP'H| 15.6 Hz, 2 P*Me*Me), 7.76 - 8.53 (m, 12 H, aromatics); and 31P{1H} n.m.r. data (121.5 MHz, CD2Cl2 at 20 oC):  58.7 (bs, 2 P, 2 PMe2), 92.8 (bs, 2 P, 2 PMe). Found: C, 39.90; H, 4.15. Calc. for C24H30F6Cl2CoP5: C, 40.19; H, 4.22%.

*Trans-[CoCl2(****3****)2]Cl* - 1H n.m.r. data (300 MHz, CD3OD at 20 oC):  1.98 (s, 24 H, 4 PMe2), 7.85 - 8.24 (m, 8 H, aromatics); and 31P{1H} n.m.r. data (121.5 MHz, CD3OD at 20 oC):  54.8 (s, 4 P). Found: C, 42.52; H, 5.56. Calc. for C20H32Cl3CoP4: C, 42.75; H, 5.74%. The structure has been verified by X-ray analysis.

**X-ray diffraction data** : (data for both cobalt(III) complexes has been submitted as a CIF file *via* email).
